# Supplementary material
Source: PubMed Central journal article supplement (PMC3310385)
Supplement: NIHMS361719-supplement-4.pdf [file NIHMS361719-supplement-4.pdf]

**Supplemental Figure 1.** Expression of embryonic globins by RT-PCR.

RT-PCR for *ae1*, *ae3*, and *βe3 globins* in 48 hpf heterozygous embryos compared to mutant siblings.

**Supplemental Figure 2.** Summary of Hematopoietic Defects in the Rps29 Mutant.
